# Supplementary material for: Efficient removal of Pb(ii) from water using magnetic Fe3S4/reduced graphene oxide composites
Source: Royal Society of Chemistry journal article supplement (doi:10.1039/c7ta05389d), 2017-01-01
Supplement: c7ta05389d1.pdf [file c7ta05389d1.pdf]

## Supplementary Information

# Efficient Removal of Pb (II) from Water by Magnetic Fe<sub>3</sub>S<sub>4</sub>/reduced Graphene Oxide Composites

Long Kong, Zhichun Li, Xueqiong Huang, Shouqiang Huang, Hua Sun, Min Liu, and Liang Li\*

School of Environmental Science and Engineering, Shanghai Jiao Tong University, 800  
Dongchuan Road, Shanghai 200240, P. R. China  
E-mail: liangli117@sjtu.edu.cn; Tel: +86 21 54747567

Supplementary information contains 12 pages, 11 figures, and 4 tables.

### Adsorption model:

All the adsorption kinetics data were fitted with two different kinetic models, pseudo-first-order model and pseudo-second-order model, expressed as follows: <sup>1</sup>

$$\ln (q_e - q_t) = \ln q_e - k_1 t \quad (1)$$

$$\frac{t}{q_t} = \frac{1}{k_2 q_e^2} + \frac{1}{q_e} t \quad (2)$$

Where  $q_t$  and  $q_e$  are the amount of adsorption at any time  $t$  (min) and equilibrium (mg g<sup>-1</sup>).  $k_1$  (min<sup>-1</sup>) and  $k_2$  (g (mg·min)<sup>-1</sup>) denote the rate constant of pseudo-first-order and pseudo-second-order sorption, respectively.

The Langmuir and Freundlich isotherm model were employed to simulate the adsorption isotherm data and can be described as: <sup>2</sup>

$$\frac{C_e}{q_e} = \frac{C_e}{q_m} + \frac{1}{q_m K_L} \quad (3)$$

$$\ln q_e = \ln K_F + \frac{1}{n} \ln C_e \quad (4)$$

where  $C_e$  is the equilibrium concentration in the liquid phases (mg L<sup>-1</sup>),  $q_m$  represent the maximum adsorption capacity (mg g<sup>-1</sup>), respectively.  $K_L$  and  $K_F$  are Langmuir sorption constant related to the affinity parameter of adsorbent and Freundlich adsorption capacity, respectively.  $1/n$  refers to the Freundlich adsorption intensity parameter.

The distribution ratio ( $K_d$ ) was obtained from the following equation: <sup>3</sup>

$$K_d = \frac{(C_0 - C_e) V}{C_0 m} \quad (5)$$

Where  $C_0$  is the initial concentration of Pb(II) (mg/L),  $V$  denotes the volume of the solution (mL),  $m$  is the weight of adsorbent (g).

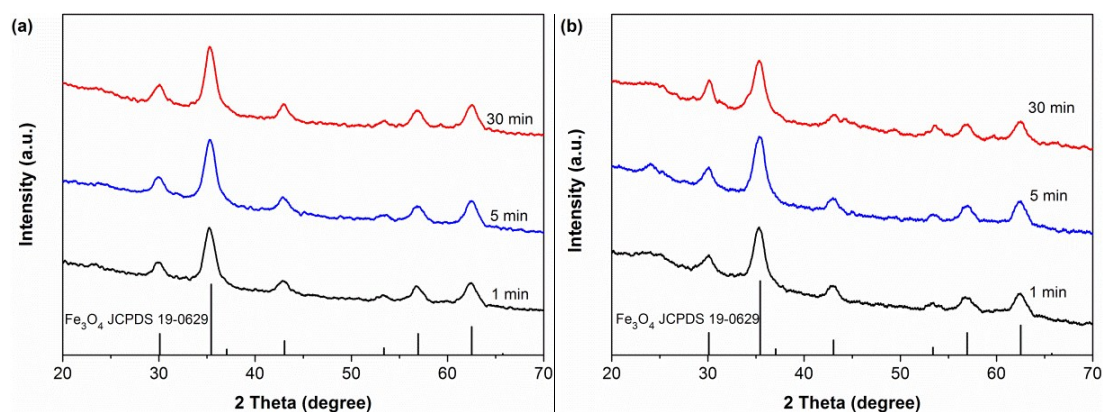

**Fig S1** XRD patterns of Fe<sub>3</sub>O<sub>4</sub>/rGO after the sulfuration reaction using (a) oleylamine and (b) 1-butylamine as solvent for sulfur powders.

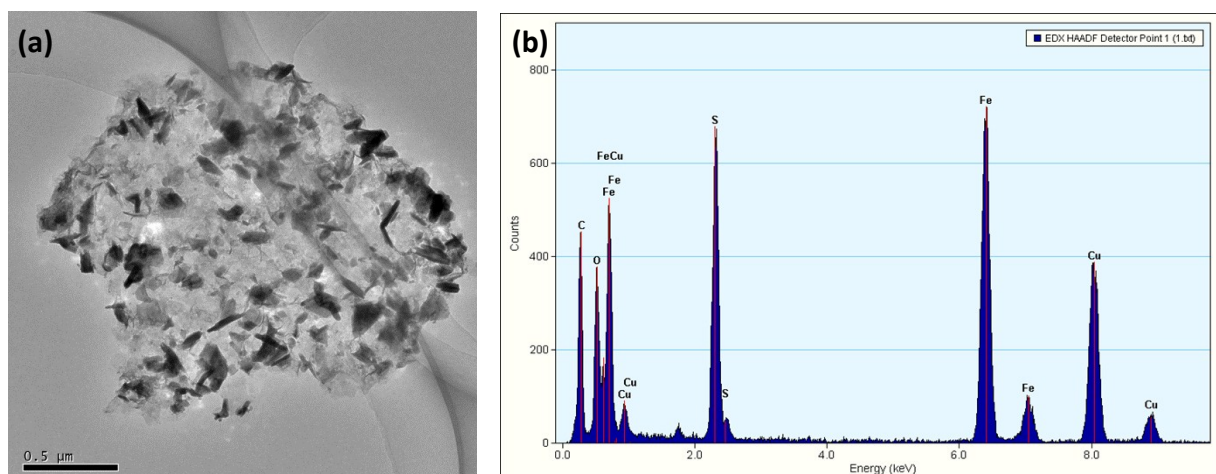

**Fig S2** (a) TEM images of Fe<sub>3</sub>S<sub>4</sub>/rGO after the sulfuration over 5 min, (b) EDX results of selected areas of Fe<sub>3</sub>S<sub>4</sub>/rGO.

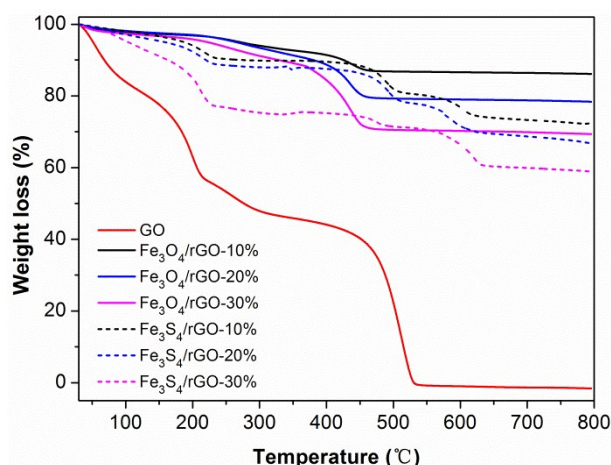

**Fig S3** TGA curves of GO, Fe<sub>3</sub>O<sub>4</sub>/rGO, and Fe<sub>3</sub>S<sub>4</sub>/rGO measured from 25 to 800 °C in air atmosphere.

The content of Fe<sub>3</sub>O<sub>4</sub> and Fe<sub>3</sub>S<sub>4</sub> in the resultant Fe<sub>3</sub>O<sub>4</sub>/rGO or Fe<sub>3</sub>S<sub>4</sub>/rGO composites was confirmed by TGA analysis. As shown in Fig S3, the residual weight of Fe<sub>3</sub>O<sub>4</sub>/rGO was 86.13%, 78.38%, and 69.35% for Fe<sub>3</sub>O<sub>4</sub>/rGO-10%, Fe<sub>3</sub>O<sub>4</sub>/rGO-20%, and Fe<sub>3</sub>O<sub>4</sub>/rGO-30% after the samples was heated to 800 in air.<sup>[4]</sup> It was pointed out that the Fe<sub>3</sub>O<sub>4</sub> phase in the Fe<sub>3</sub>O<sub>4</sub>/rGO can be oxidized by air to Fe<sub>2</sub>O<sub>3</sub>. Based on the weight of Fe<sub>2</sub>O<sub>3</sub> after 800 °C, the Fe<sub>3</sub>O<sub>4</sub> content in Fe<sub>3</sub>O<sub>4</sub>/rGO-10%, Fe<sub>3</sub>O<sub>4</sub>/rGO-20%, and Fe<sub>3</sub>O<sub>4</sub>/rGO-30% was calculated to be 83.25%, 75.77%, and 67.21%. Accordingly, the content of rGO was about 16.75 wt%, 24.23 wt%, and 32.79 wt%, respectively. As for Fe<sub>3</sub>S<sub>4</sub>/rGO, it exhibited a different thermal oxidative degradation features since Fe<sub>3</sub>O<sub>4</sub> and Fe<sub>3</sub>S<sub>4</sub> coexisted in the composites. Under test conditions (25-800 °C, air flow), the weight loss of Fe<sub>3</sub>S<sub>4</sub>/rGO corresponds to the oxidation of Fe<sub>3</sub>O<sub>4</sub> and Fe<sub>3</sub>S<sub>4</sub> and the decomposition of rGO, leaving the final products as Fe<sub>2</sub>O<sub>3</sub>. The remaining weight of Fe<sub>3</sub>S<sub>4</sub>/rGO-10%, Fe<sub>3</sub>S<sub>4</sub>/rGO-20%, and Fe<sub>3</sub>S<sub>4</sub>/rGO-30% composites was 72.21%, 66.77%, and 58.89%, respectively. The difference of residual weight between Fe<sub>3</sub>O<sub>4</sub>/rGO and its corresponding Fe<sub>3</sub>S<sub>4</sub>/rGO composite was assigned to the weight loss in oxidation process of Fe<sub>3</sub>S<sub>4</sub>. Therefore, the Fe<sub>3</sub>S<sub>4</sub> content was calculated to be about 61.89%, 51.99%, and 47.59% in Fe<sub>3</sub>S<sub>4</sub>/rGO-10%, Fe<sub>3</sub>S<sub>4</sub>/rGO-20%, and Fe<sub>3</sub>S<sub>4</sub>/rGO-30%. The accurate contents of Fe<sub>3</sub>O<sub>4</sub> and Fe<sub>3</sub>S<sub>4</sub> in the composites were listed in Table S2.

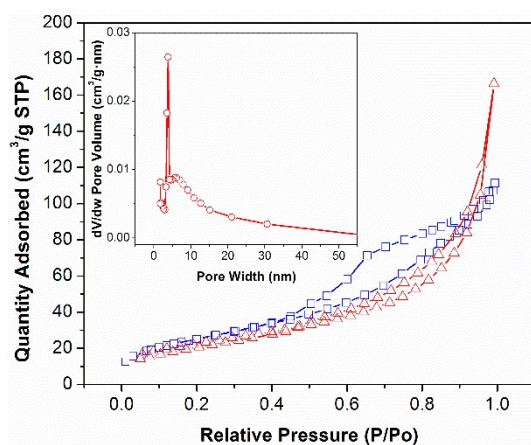

**Fig S4** Nitrogen adsorption-desorption isotherms of  $\text{Fe}_3\text{O}_4/\text{rGO}$  and  $\text{Fe}_3\text{S}_4/\text{rGO}$ . Inset: BJH pore size distribution (mainly 3-4 nm) of  $\text{Fe}_3\text{S}_4/\text{rGO}$ .

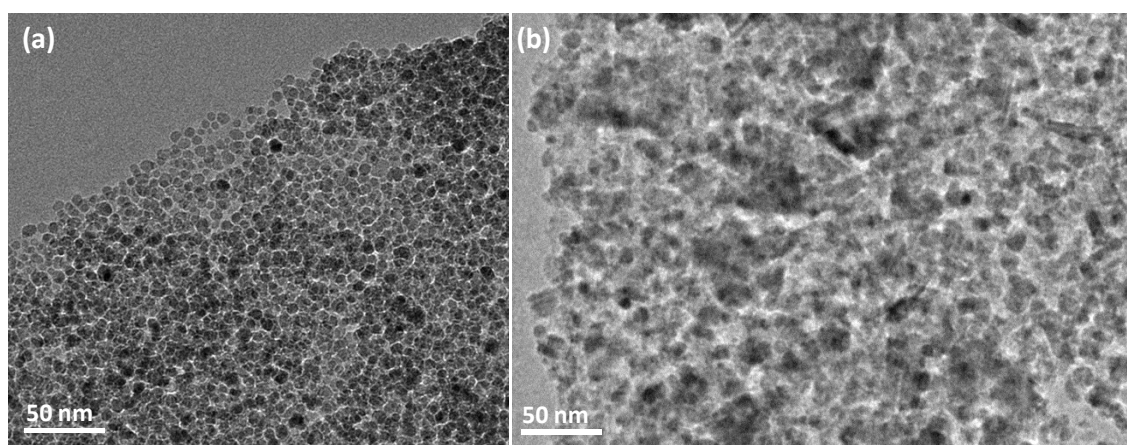

**Fig S5** TEM images of (a)  $\text{Fe}_3\text{O}_4/\text{rGO}-10\%$  and (b)  $\text{Fe}_3\text{S}_4/\text{rGO}-10\%$ .

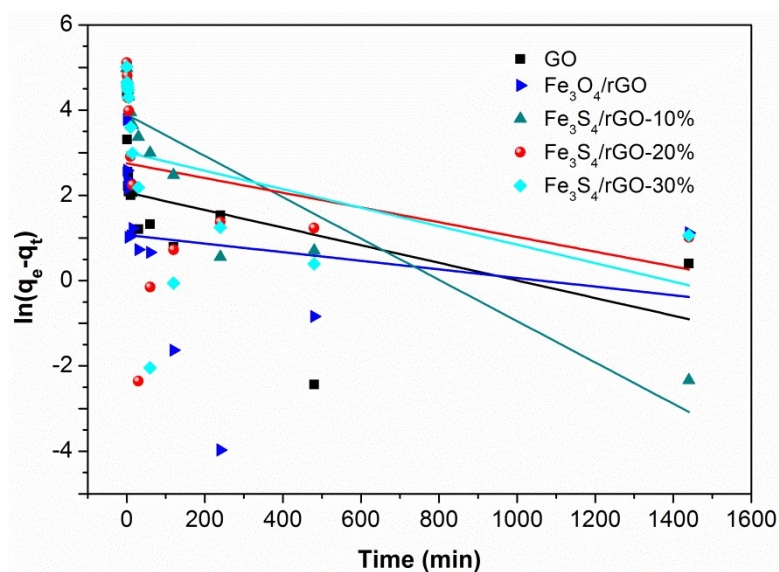

**Fig S6** Test of pseudo-first-order model for adsorption of Pb (II) on different adsorbents. The symbols are experimental data and the solid lines represent the fitted curves.

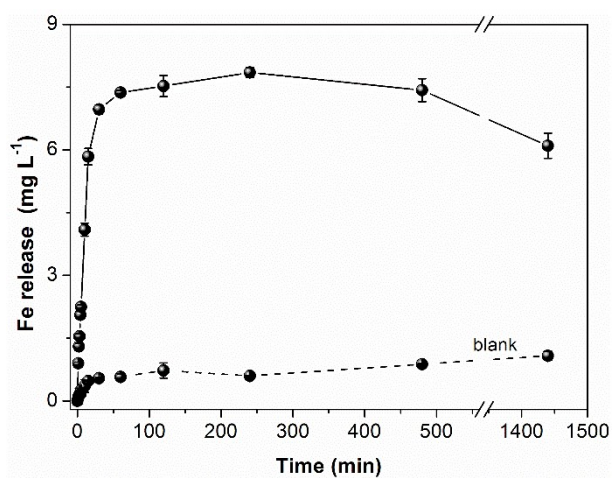

**Fig S7** Fe release kinetics of  $\text{Fe}_3\text{S}_4/\text{rGO}$  in the adsorption process toward Pb (II). Experimental conditions: initial Pb (II) concentration  $50 \text{ mg L}^{-1}$  100 mL, sorbent 25 mg, pH 6, temperature  $25^\circ\text{C}$ . The dash line represented the blank samples,  $\text{Fe}_3\text{S}_4/\text{rGO}$  solution without the addition of Pb (II).



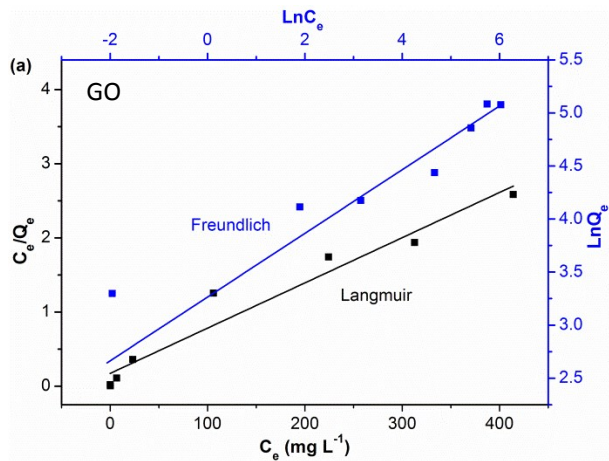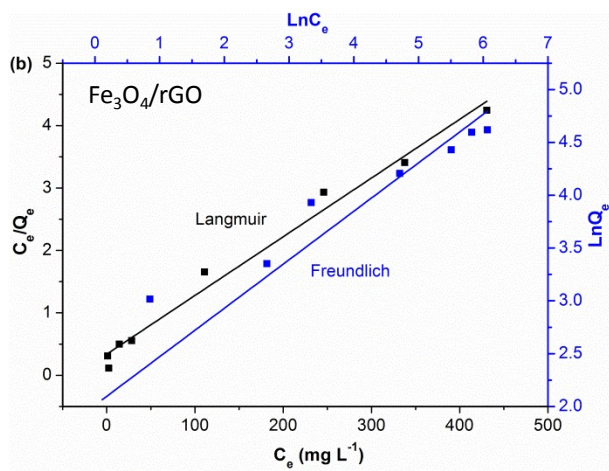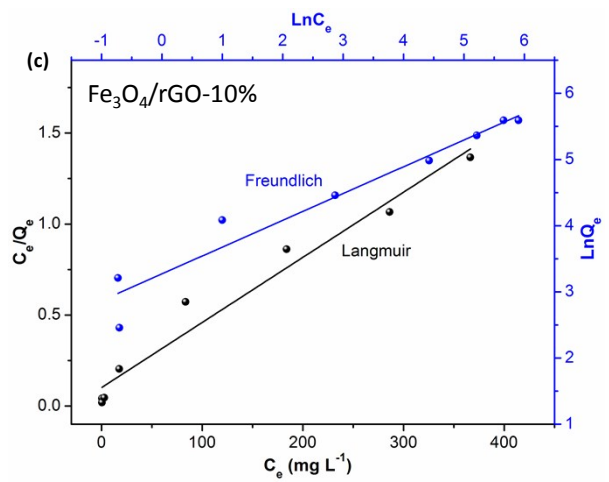

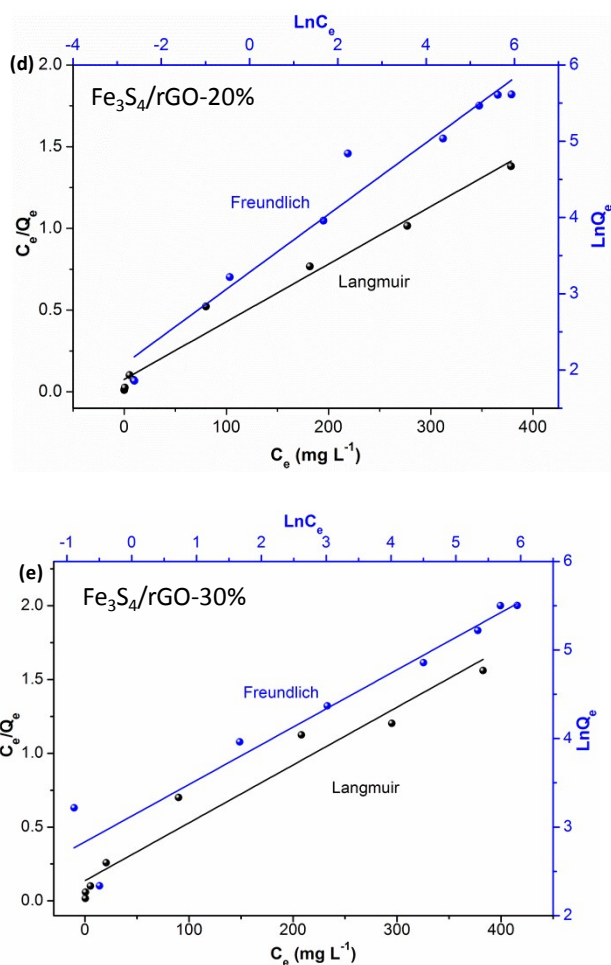

**Fig S8** The fittings of Langmuir model and Freundlich model for the adsorption of Pb (II) by GO (a),  $\text{Fe}_3\text{O}_4/\text{rGO}$  (b),  $\text{Fe}_3\text{S}_4/\text{rGO}-10\%$  (c),  $\text{Fe}_3\text{S}_4/\text{rGO}-20\%$  (d), and  $\text{Fe}_3\text{S}_4/\text{rGO}-30\%$  (e). The symbols are experimental data; the solid lines represent the fitted curves.

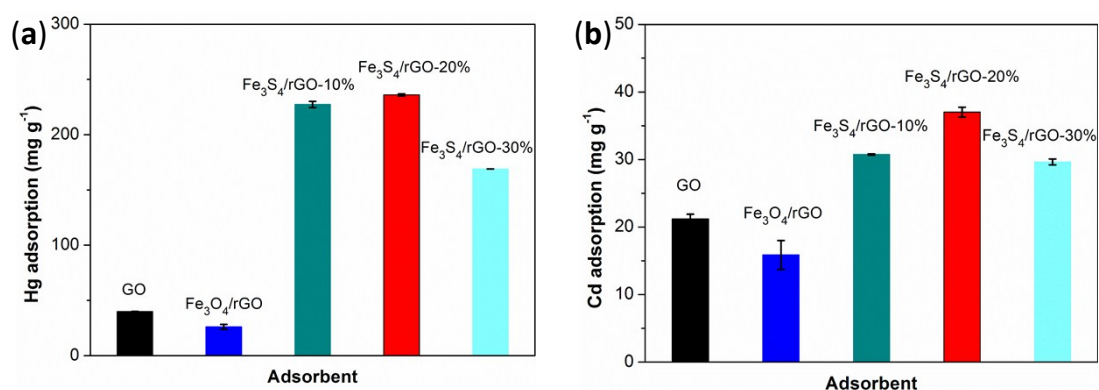

**Fig S9** Adsorption performance of GO,  $\text{Fe}_3\text{O}_4/\text{rGO}$ , and  $\text{Fe}_3\text{S}_4/\text{rGO}$  composites toward (a) Hg (II) and (b) Cd (II). Experimental conditions: initial concentration (60 mg L<sup>-1</sup> Hg (II), 50 mg L<sup>-1</sup> Cd (II)) 100 mL, sorbent 25 mg, pH 6, contact time 24 h, temperature 25 °C.



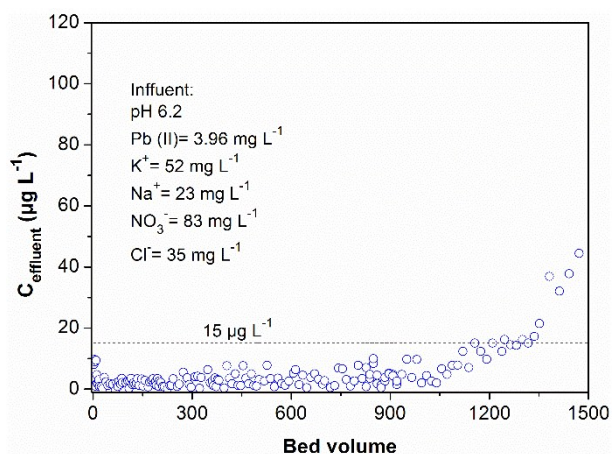

**Fig S10** Column adsorption of Pb (II) by  $\text{Fe}_3\text{S}_4/\text{rGO}$  from a synthetic Pb (II) feeding solution.

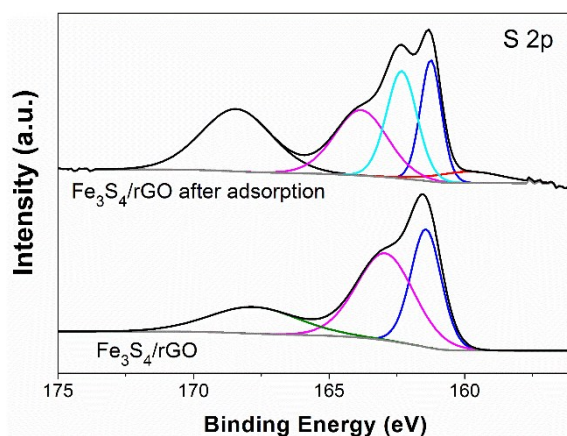

**Fig S11** XPS spectra of S 2p for  $\text{Fe}_3\text{S}_4/\text{rGO}$  before and after Pb (II) adsorption.

**Table S1** Element content of the  $\text{Fe}_3\text{S}_4/\text{rGO}$  sample from the XPS analysis.

| Name  | Pos.   | FWHM | Area     | At%   | Wt%   |
|-------|--------|------|----------|-------|-------|
| C 1s  | 284.82 | 1.44 | 10231.13 | 50.87 | 29.80 |
| Fe 2p | 711.18 | 4.55 | 25750.38 | 12.03 | 32.76 |
| S 2p  | 161.33 | 2.32 | 5236.89  | 10.84 | 10.84 |
| O 1s  | 531.63 | 3.19 | 14818.42 | 26.26 | 26.26 |

**Table S2** Contents of the Fe<sub>3</sub>O<sub>4</sub>/rGO and Fe<sub>3</sub>S<sub>4</sub>/rGO samples from the TGA analysis.

| Sample                                  | Fe <sub>3</sub> O <sub>4</sub> (wt%) | Fe <sub>3</sub> S <sub>4</sub> (wt%) | rGO (wt%) |
|-----------------------------------------|--------------------------------------|--------------------------------------|-----------|
| Fe <sub>3</sub> O <sub>4</sub> /rGO-10% | 83.25                                | --                                   | 16.75     |
| Fe <sub>3</sub> O <sub>4</sub> /rGO-20% | 75.77                                | --                                   | 24.23     |
| Fe <sub>3</sub> O <sub>4</sub> /rGO-30% | 67.21                                | --                                   | 32.79     |
| Fe <sub>3</sub> S <sub>4</sub> /rGO-10% | 21.36                                | 61.89                                | 16.75     |
| Fe <sub>3</sub> S <sub>4</sub> /rGO-20% | 23.78                                | 51.99                                | 24.23     |
| Fe <sub>3</sub> S <sub>4</sub> /rGO-30% | 19.62                                | 47.59                                | 32.79     |

**Table S3** Adsorption isotherm parameters for Langmuir and Freundlich model of Pb (II) adsorption.

| Adsorbent                               | Langmuir model                       |                                      |                | Freundlich model                     |      |                |
|-----------------------------------------|--------------------------------------|--------------------------------------|----------------|--------------------------------------|------|----------------|
|                                         | Q <sub>m</sub> (mg g <sup>-1</sup> ) | K <sub>L</sub> (L mg <sup>-1</sup> ) | R <sup>2</sup> | K <sub>F</sub> (mg g <sup>-1</sup> ) | n    | R <sup>2</sup> |
| GO                                      | 163.93                               | 0.036                                | 0.984          | 26.16                                | 3.33 | 0.849          |
| Fe <sub>3</sub> O <sub>4</sub> /rGO     | 106.27                               | 0.028                                | 0.984          | 7.48                                 | 2.18 | 0.844          |
| Fe <sub>3</sub> S <sub>4</sub> /rGO-10% | 279.33                               | 0.036                                | 0.964          | 26.36                                | 2.47 | 0.935          |
| Fe <sub>3</sub> S <sub>4</sub> /rGO-20% | 285.71                               | 0.046                                | 0.976          | 26.65                                | 2.36 | 0.950          |
| Fe <sub>3</sub> S <sub>4</sub> /rGO-30% | 255.51                               | 0.029                                | 0.948          | 22.71                                | 2.48 | 0.924          |

**Table S4** Comparison of Pb (II) adsorption capacities of various adsorbents

| Adsorbent                                                                                              | Sorption capacity                 | Adsorption conditions           | Refs      |
|--------------------------------------------------------------------------------------------------------|-----------------------------------|---------------------------------|-----------|
|                                                                                                        | ( $Q_{\max}$ mg g <sup>-1</sup> ) |                                 |           |
| Graphene nanosheets                                                                                    | 35.46                             | pH 4, 303K                      | 5         |
| Graphene oxide                                                                                         | 152.71                            | pH 4.5, 298K                    | 6         |
| Fe <sub>3</sub> O <sub>4</sub>                                                                         | 52.94                             | pH 6, 298K                      | 7         |
| Amorphous Fe <sub>3</sub> O <sub>4</sub>                                                               | 22.83                             | pH = 5 ± 0.2, 303K              | 8         |
| Porous NiFe <sub>2</sub> O <sub>4</sub>                                                                | 48.98                             | pH 5, 308K                      | 9         |
| Fe <sub>2</sub> O <sub>3</sub> -APTES-EDTA                                                             | 100.20                            | room temperature<br>(295-298K). | 10        |
| Fe <sub>3</sub> O <sub>4</sub> -SiO <sub>2</sub> -TETA                                                 | 62.16                             | pH 7, room temperature          | 11        |
| multiwall carbon nanotubes/Fe <sub>3</sub> O <sub>4</sub> (MWCNTs/<br>Fe <sub>3</sub> O <sub>4</sub> ) | 41.77                             | pH 5.3, 303K                    | 12        |
| MWCNTs/Fe <sub>3</sub> O <sub>4</sub> -NH <sub>2</sub>                                                 | 75.02                             | pH 5.3, 303K                    | 12        |
| Iron oxides                                                                                            | 5.60                              | pH 5.5, 293K                    | 13        |
| MWCNTs/iron oxides                                                                                     | 9.85                              | pH 5.5, 293K                    | 13        |
| MWCNTs/iron oxides/cyclodextrin                                                                        | 12.29                             | pH 5.5, 293K                    | 13        |
| Thiol-functionalized magnetic mesoporous silica                                                        | 91.50                             | pH 6.5, 298K                    | 14        |
| Graphene-Fe <sub>3</sub> O <sub>4</sub> composites                                                     | 69.00                             | pH 5, 300K                      | 15        |
| Magnetic chitosan/graphene oxide composites                                                            | 76.94                             | pH 5, 303K                      | 16        |
| Amino functionalized Fe <sub>3</sub> O <sub>4</sub> /<br>graphenes composite                           | 27.95                             | pH 6-7, room temperature        | 17        |
| Layered Double Hydroxide Intercalated with<br>MoS <sub>4</sub> <sup>2-</sup> Ions                      | 288.90                            | pH 5.1, room temperature        | 18        |
| Fe <sub>3</sub> S <sub>4</sub> hollow spheres                                                          | 92.10                             | NA                              | 19        |
| Fe <sub>3</sub> S <sub>4</sub> /rGO-10%                                                                | 279.33                            |                                 |           |
| Fe <sub>3</sub> S <sub>4</sub> /rGO-20%                                                                | 285.71                            | pH 6, 298K                      | This work |
| Fe <sub>3</sub> S <sub>4</sub> /rGO-30%                                                                | 255.51                            |                                 |           |

## References:

- [1] Ch. Ling, F. Q. Liu, C. Xu, T. P. Chen, A. M. Li, *ACS Appl. Mater. Interfaces*, 2013, **5**, 11808–11817.
- [2] Y. H. Li, Q. J. Du, X. D. Wang, P. Zhang, D. C. Wang, Z. H. Wang, Y. Z. Xia, *J. Hazard. Mater.*, 2010, **183**, 583–589.
- [3] Zhang, Q.; Du, Q.; Hua, M.; Jiao, T.; Gao, F.; Pan, B. *Environ. Sci. Technol.* 2013, **47**, 6536–6544.
- [4] Z. S. Wu, S. Yang, Y. Sun, K. Parvez, X. Feng, and K. Müllen, *J. Am. Chem. Soc.*, 2012, **22**, 9082-9085.
- [5] Z. H. Huang, X. Zheng, W. Lv, M. Wang, Q. H. Yang, F. Kang, *Langmuir*, 2011, **27**, 7558-7562.
- [6] K. Yang, B. Chen, X. Zhu, and B. Xing, *Environ. Sci. Technol.*, 2016, **50**, 11066-11075.
- [7] S. Rajput, C. U. Pittman, and D. Mohan, *J. Colloid. Interf. Sci.*, 2016, **468**, 334-346.
- [8] C. Zhang, Z. Yu, G. Zeng, B. Huang, H. Dong, J. Huang, Z. Yang, J. Wei, L. Hu, and Q. Zhang, *Chem. Eng. J.*, 2016, **284**, 247-259.
- [9] Reddy, D. H. K.; Lee, S.M., *Ind. Eng. Chem. Res.* 2013, **52**, 15789-15800.
- [10] Y. Huang, and A. A. Keller, *Water Res*, 2015, **80**, 159-168.
- [11] M.E. Mahmoud, M.S. Abdelwahab, and E.M. Fathallah, *Chem. Eng. J.*, 2013, **223**, 318-327.
- [12] L. Q. Ji, L. C. Zhou, X. Bai, Y. M. Shao, G. H. Zhao, Y. Z. Qu, C. Wang and Y. F. Li, *J. Mater. Chem.*, 2012, **22**, 15853–15862.
- [13] J. Hu, D. D. Shao, C. L. Chen, G. D. Sheng, J. X. Li, X. K. Wang and M. Nagatsu, *J. Phys. Chem. B*, 2010, **114**, 6779–6785.
- [14] G. Li, Z. Zhao, J. Liu, G. Jiang, *J. Hazard. Mater.*, 2011, **192**, 277-283.
- [15] C. Santhosh, P. Kollu, S. Doshi, M. Sharma, D. Bahadur, M. T. Vanchinathan, P. Saravanan, B. S. Kim, and A. N. Grace, *RSC Adv.*, 2014, **4**, 28300-28308.
- [16] L. Fan, C. Luo, M. Sun, X. Li, H. Qiu, *Colloids Surf., B*, 2013, **103**, 523-529.
- [17] Guo, X. Y.; Du, B.; Wei, Q.; Yang, J.; Hu, L. H.; Yan, L. G.; Xu, W. Y. *J. Hazard. Mater.* 2014, **278**, 211.
- [18] L. Ma, Q. Wang, S. M. Islam, Y. Liu, S. Ma, and M. G. Kanatzidis, *J. Am. Chem. Soc.*, 2016, **138**, 2858-2866.
- [19] J. Zheng, Y. Cao, C. Cheng, C. Chen, R. W. Yan, H. X. Huai, Q. F. Dong, M. S. Zheng and C. C. Wang, *J. Mater. Chem. A.*, 2014, **2**, 19882–19888.
